# Supplementary material for: From cow to cheese: genetic parameters of the flavour fingerprint of cheese investigated by direct-injection mass spectrometry (PTR-ToF-MS)
Source: Springer Nature journal article supplement (doi:10.1186/s12711-016-0263-4), 2016-11-16
Supplement: MOESM1 [file 12711_2016_263_MOESM1_ESM.pdf]

| <i>m/z</i> | ln ppb <sub>v</sub> <sup>1</sup> | CV, % | $\sigma_p$ | $\sigma_E$ | $\sigma_H$ | $\sigma_G$ | Heritability      |                  |
|------------|----------------------------------|-------|------------|------------|------------|------------|-------------------|------------------|
|            |                                  |       |            |            |            |            | Mean <sup>2</sup> | PSD <sup>3</sup> |
| 33.034     | 9.24                             | 6.6   | 1.022      | 0.429      | 0.921      | 0.113      | 0.065             | 0.009            |
| 34.037     | 5.11                             | 10.8  | 1.023      | 0.407      | 0.930      | 0.124      | 0.085             | 0.010            |
| 34.995     | 4.47                             | 15.2  | 0.990      | 0.887      | 0.388      | 0.206      | 0.051             | 0.032            |
| 39.023     | 7.64                             | 9.2   | 1.005      | 0.826      | 0.498      | 0.282      | 0.105             | 0.053            |
| 40.027     | 4.87                             | 11.9  | 1.008      | 0.855      | 0.470      | 0.251      | 0.079             | 0.045            |
| 41.039     | 10.35                            | 4.5   | 1.000      | 0.776      | 0.593      | 0.214      | 0.071             | 0.032            |
| 42.010     | 5.95                             | 7.5   | 0.992      | 0.894      | 0.351      | 0.251      | 0.073             | 0.042            |
| 42.034     | 8.08                             | 11.2  | 1.026      | 0.308      | 0.976      | 0.072      | 0.052             | 0.004            |
| 42.043     | 7.39                             | 7.5   | 1.007      | 0.851      | 0.488      | 0.229      | 0.067             | 0.036            |
| 43.018     | 11.25                            | 3.7   | 1.013      | 0.855      | 0.509      | 0.188      | 0.046             | 0.026            |
| 43.054     | 11.09                            | 3.4   | 0.997      | 0.864      | 0.447      | 0.219      | 0.060             | 0.034            |
| 43.094     | 5.07                             | 7.2   | 1.001      | 0.869      | 0.434      | 0.241      | 0.071             | 0.041            |
| 44.022     | 7.56                             | 5.1   | 1.013      | 0.855      | 0.511      | 0.185      | 0.045             | 0.025            |
| 44.058     | 7.78                             | 5.2   | 0.996      | 0.831      | 0.502      | 0.221      | 0.066             | 0.034            |
| 44.980     | 4.64                             | 14.2  | 1.006      | 0.928      | 0.203      | 0.330      | 0.113             | 0.060            |
| 45.033     | 10.93                            | 5.1   | 1.008      | 0.765      | 0.625      | 0.204      | 0.066             | 0.031            |
| 46.031     | 5.74                             | 11.9  | 1.013      | 0.739      | 0.639      | 0.267      | 0.115             | 0.045            |
| 46.038     | 7.14                             | 8.8   | 1.009      | 0.774      | 0.622      | 0.181      | 0.052             | 0.025            |
| 48.012     | 5.69                             | 7.7   | 0.991      | 0.763      | 0.550      | 0.311      | 0.143             | 0.049            |
| 48.053     | 10.03                            | 8.2   | 0.995      | 0.741      | 0.598      | 0.287      | 0.131             | 0.044            |
| 49.011     | 6.82                             | 9.8   | 0.994      | 0.800      | 0.507      | 0.302      | 0.125             | 0.051            |
| 49.028     | 5.28                             | 13.8  | 1.006      | 0.896      | 0.374      | 0.262      | 0.078             | 0.051            |
| 49.054     | 7.72                             | 10.3  | 0.995      | 0.737      | 0.600      | 0.296      | 0.139             | 0.045            |
| 50.000     | 5.11                             | 16.6  | 0.995      | 0.750      | 0.555      | 0.346      | 0.176             | 0.053            |
| 50.057     | 4.58                             | 9.6   | 0.992      | 0.754      | 0.562      | 0.313      | 0.147             | 0.050            |
| 51.007     | 4.59                             | 10.5  | 0.993      | 0.801      | 0.510      | 0.290      | 0.116             | 0.050            |
| 51.044     | 7.68                             | 7.9   | 1.020      | 0.577      | 0.832      | 0.130      | 0.048             | 0.013            |
| 53.039     | 4.50                             | 12.1  | 1.014      | 0.702      | 0.717      | 0.145      | 0.041             | 0.017            |
| 54.034     | 4.24                             | 13.9  | 1.029      | 0.255      | 0.992      | 0.098      | 0.129             | 0.005            |
| 55.055     | 7.08                             | 22.1  | 1.000      | 0.915      | 0.327      | 0.239      | 0.064             | 0.040            |
| 56.045     | 5.33                             | 9.8   | 0.988      | 0.957      | 0.122      | 0.212      | 0.047             | 0.037            |
| 56.060     | 5.86                             | 8.7   | 1.017      | 0.704      | 0.700      | 0.223      | 0.091             | 0.032            |
| 57.033     | 6.70                             | 10.0  | 1.007      | 0.805      | 0.516      | 0.317      | 0.134             | 0.058            |
| 57.070     | 10.55                            | 6.2   | 0.991      | 0.753      | 0.606      | 0.217      | 0.077             | 0.033            |
| 58.041     | 5.72                             | 15.5  | 0.991      | 0.839      | 0.471      | 0.239      | 0.075             | 0.039            |
| 58.073     | 7.47                             | 8.7   | 0.992      | 0.747      | 0.613      | 0.228      | 0.085             | 0.035            |
| 59.049     | 10.52                            | 7.5   | 1.010      | 0.696      | 0.715      | 0.161      | 0.051             | 0.020            |
| 59.329     | 4.34                             | 11.7  | 1.008      | 0.699      | 0.708      | 0.165      | 0.053             | 0.022            |
| 60.021     | 5.81                             | 13.9  | 1.002      | 0.867      | 0.432      | 0.257      | 0.081             | 0.048            |
| 60.045     | 5.39                             | 13.5  | 1.023      | 0.600      | 0.818      | 0.134      | 0.047             | 0.014            |
| 60.053     | 7.15                             | 10.7  | 1.010      | 0.696      | 0.714      | 0.162      | 0.051             | 0.021            |
| 61.028     | 11.04                            | 4.4   | 1.009      | 0.867      | 0.478      | 0.194      | 0.048             | 0.027            |
| 61.062     | 7.19                             | 5.8   | 0.996      | 0.840      | 0.482      | 0.231      | 0.070             | 0.036            |

|        |       |      |       |       |       |       |       |       |
|--------|-------|------|-------|-------|-------|-------|-------|-------|
| 62.032 | 7.38  | 6.2  | 1.010 | 0.867 | 0.482 | 0.193 | 0.047 | 0.027 |
| 62.068 | 4.40  | 6.9  | 0.993 | 0.828 | 0.464 | 0.291 | 0.110 | 0.049 |
| 63.027 | 7.10  | 13.3 | 1.028 | 0.594 | 0.824 | 0.161 | 0.068 | 0.018 |
| 63.044 | 8.02  | 6.1  | 1.009 | 0.812 | 0.570 | 0.183 | 0.048 | 0.026 |
| 64.031 | 4.48  | 13.7 | 1.026 | 0.618 | 0.799 | 0.180 | 0.078 | 0.022 |
| 64.048 | 4.82  | 8.8  | 1.006 | 0.794 | 0.572 | 0.235 | 0.080 | 0.040 |
| 65.018 | 5.37  | 13.4 | 1.007 | 0.866 | 0.476 | 0.194 | 0.048 | 0.026 |
| 66.063 | 8.61  | 10.0 | 0.995 | 0.766 | 0.567 | 0.286 | 0.122 | 0.044 |
| 67.058 | 5.65  | 7.8  | 0.998 | 0.896 | 0.396 | 0.191 | 0.043 | 0.030 |
| 67.065 | 6.75  | 13.3 | 0.998 | 0.767 | 0.570 | 0.288 | 0.124 | 0.044 |
| 68.067 | 4.29  | 7.7  | 0.992 | 0.794 | 0.510 | 0.305 | 0.129 | 0.050 |
| 69.033 | 4.35  | 8.8  | 1.008 | 0.799 | 0.583 | 0.191 | 0.054 | 0.027 |
| 69.058 | 4.58  | 18.5 | 1.007 | 0.924 | 0.337 | 0.217 | 0.052 | 0.035 |
| 69.070 | 8.43  | 6.9  | 1.006 | 0.871 | 0.459 | 0.209 | 0.054 | 0.031 |
| 70.064 | 5.13  | 9.8  | 1.017 | 0.674 | 0.742 | 0.171 | 0.061 | 0.021 |
| 70.078 | 6.89  | 9.4  | 1.010 | 0.756 | 0.643 | 0.190 | 0.059 | 0.025 |
| 71.049 | 9.50  | 6.3  | 1.009 | 0.888 | 0.425 | 0.224 | 0.060 | 0.038 |
| 71.086 | 10.38 | 4.5  | 0.991 | 0.835 | 0.496 | 0.199 | 0.054 | 0.029 |
| 72.053 | 6.53  | 8.6  | 1.009 | 0.892 | 0.420 | 0.217 | 0.056 | 0.038 |
| 72.089 | 7.54  | 5.9  | 0.993 | 0.829 | 0.508 | 0.202 | 0.056 | 0.030 |
| 73.027 | 5.50  | 12.2 | 1.006 | 0.908 | 0.351 | 0.254 | 0.072 | 0.050 |
| 73.051 | 6.57  | 18.6 | 1.011 | 0.981 | 0.127 | 0.212 | 0.044 | 0.036 |
| 73.065 | 9.88  | 6.3  | 1.011 | 0.838 | 0.543 | 0.154 | 0.032 | 0.019 |
| 74.034 | 4.34  | 12.0 | 1.004 | 0.863 | 0.459 | 0.231 | 0.067 | 0.037 |
| 74.051 | 4.49  | 13.8 | 1.006 | 0.970 | 0.101 | 0.245 | 0.060 | 0.044 |
| 74.069 | 6.85  | 8.7  | 1.010 | 0.839 | 0.542 | 0.155 | 0.033 | 0.020 |
| 75.027 | 5.47  | 17.6 | 1.010 | 0.954 | 0.096 | 0.320 | 0.101 | 0.060 |
| 75.044 | 8.22  | 8.2  | 1.025 | 0.490 | 0.888 | 0.146 | 0.081 | 0.013 |
| 75.080 | 7.70  | 14.8 | 0.990 | 0.763 | 0.554 | 0.302 | 0.136 | 0.048 |
| 76.047 | 5.26  | 10.3 | 1.023 | 0.469 | 0.903 | 0.110 | 0.052 | 0.009 |
| 76.084 | 5.12  | 15.5 | 0.987 | 0.769 | 0.534 | 0.313 | 0.142 | 0.052 |
| 77.060 | 6.43  | 10.5 | 1.013 | 0.760 | 0.649 | 0.163 | 0.044 | 0.021 |
| 78.001 | 4.23  | 21.0 | 0.999 | 0.944 | 0.232 | 0.230 | 0.056 | 0.037 |
| 79.040 | 8.53  | 7.2  | 1.010 | 0.900 | 0.424 | 0.178 | 0.038 | 0.024 |
| 79.055 | 6.87  | 23.3 | 1.006 | 0.964 | 0.186 | 0.220 | 0.050 | 0.038 |
| 79.075 | 6.17  | 10.4 | 0.991 | 0.835 | 0.477 | 0.241 | 0.077 | 0.039 |
| 80.046 | 5.47  | 8.4  | 1.009 | 0.895 | 0.432 | 0.170 | 0.035 | 0.024 |
| 80.058 | 4.66  | 20.0 | 1.004 | 0.958 | 0.218 | 0.208 | 0.045 | 0.034 |
| 80.991 | 6.17  | 10.3 | 1.004 | 0.783 | 0.596 | 0.198 | 0.060 | 0.028 |
| 81.039 | 4.63  | 8.2  | 1.010 | 0.843 | 0.534 | 0.153 | 0.032 | 0.019 |
| 81.061 | 4.87  | 10.7 | 1.018 | 0.683 | 0.730 | 0.193 | 0.074 | 0.028 |
| 81.070 | 5.37  | 8.6  | 1.021 | 0.669 | 0.692 | 0.340 | 0.206 | 0.056 |
| 82.945 | 4.48  | 15.6 | 1.028 | 0.220 | 1.001 | 0.087 | 0.135 | 0.004 |
| 82.988 | 5.20  | 11.2 | 1.001 | 0.789 | 0.588 | 0.183 | 0.051 | 0.025 |
| 83.052 | 4.97  | 10.7 | 1.009 | 0.798 | 0.568 | 0.241 | 0.084 | 0.036 |
| 83.071 | 7.44  | 12.8 | 0.996 | 0.787 | 0.536 | 0.291 | 0.120 | 0.046 |

|         |       |      |       |       |       |       |       |       |
|---------|-------|------|-------|-------|-------|-------|-------|-------|
| 83.086  | 6.13  | 11.3 | 0.998 | 0.825 | 0.453 | 0.333 | 0.140 | 0.056 |
| 84.075  | 4.41  | 13.1 | 0.988 | 0.839 | 0.420 | 0.309 | 0.119 | 0.052 |
| 84.079  | 4.25  | 13.4 | 1.004 | 0.938 | 0.248 | 0.258 | 0.070 | 0.046 |
| 84.942  | 4.29  | 14.7 | 1.027 | 0.220 | 1.001 | 0.076 | 0.106 | 0.003 |
| 85.029  | 4.46  | 8.9  | 1.005 | 0.910 | 0.320 | 0.283 | 0.088 | 0.051 |
| 85.065  | 6.60  | 9.1  | 1.001 | 0.924 | 0.342 | 0.177 | 0.035 | 0.025 |
| 85.101  | 6.66  | 8.3  | 1.007 | 0.725 | 0.654 | 0.245 | 0.102 | 0.038 |
| 86.072  | 5.00  | 14.1 | 0.992 | 0.829 | 0.483 | 0.249 | 0.083 | 0.041 |
| 86.105  | 4.54  | 9.5  | 1.007 | 0.728 | 0.649 | 0.250 | 0.106 | 0.041 |
| 87.044  | 7.20  | 11.0 | 1.010 | 0.890 | 0.425 | 0.217 | 0.056 | 0.036 |
| 87.080  | 10.42 | 10.4 | 1.000 | 0.791 | 0.577 | 0.203 | 0.061 | 0.029 |
| 88.052  | 5.22  | 9.6  | 1.015 | 0.840 | 0.536 | 0.192 | 0.050 | 0.029 |
| 88.084  | 7.61  | 12.4 | 1.001 | 0.789 | 0.569 | 0.238 | 0.083 | 0.035 |
| 89.060  | 10.76 | 4.1  | 1.010 | 0.818 | 0.553 | 0.210 | 0.062 | 0.031 |
| 90.063  | 7.69  | 5.6  | 1.010 | 0.818 | 0.554 | 0.207 | 0.060 | 0.030 |
| 91.051  | 6.52  | 22.4 | 1.007 | 0.906 | 0.375 | 0.231 | 0.061 | 0.039 |
| 91.059  | 8.47  | 9.5  | 1.009 | 0.936 | 0.211 | 0.313 | 0.101 | 0.057 |
| 92.061  | 6.64  | 14.6 | 1.023 | 0.492 | 0.885 | 0.150 | 0.085 | 0.016 |
| 93.037  | 7.78  | 10.0 | 1.007 | 0.947 | 0.261 | 0.220 | 0.051 | 0.037 |
| 93.069  | 8.96  | 18.0 | 1.009 | 0.716 | 0.693 | 0.160 | 0.048 | 0.022 |
| 93.090  | 10.11 | 13.5 | 0.996 | 0.764 | 0.566 | 0.294 | 0.129 | 0.048 |
| 93.181  | 4.19  | 12.5 | 0.998 | 0.871 | 0.399 | 0.281 | 0.094 | 0.050 |
| 93.432  | 4.54  | 10.0 | 0.998 | 0.759 | 0.542 | 0.354 | 0.179 | 0.062 |
| 94.039  | 5.43  | 16.5 | 1.009 | 0.971 | 0.161 | 0.221 | 0.049 | 0.038 |
| 94.074  | 6.64  | 20.4 | 1.021 | 0.437 | 0.913 | 0.135 | 0.087 | 0.013 |
| 94.095  | 6.92  | 19.8 | 0.996 | 0.767 | 0.561 | 0.298 | 0.131 | 0.046 |
| 95.004  | 4.72  | 13.8 | 1.021 | 0.567 | 0.825 | 0.199 | 0.110 | 0.024 |
| 95.017  | 5.04  | 14.1 | 1.013 | 0.847 | 0.415 | 0.370 | 0.161 | 0.064 |
| 95.034  | 5.22  | 12.3 | 1.005 | 0.942 | 0.202 | 0.286 | 0.085 | 0.055 |
| 95.049  | 4.98  | 11.3 | 1.024 | 0.367 | 0.946 | 0.135 | 0.119 | 0.012 |
| 95.081  | 4.93  | 13.5 | 1.020 | 0.430 | 0.920 | 0.093 | 0.045 | 0.007 |
| 95.096  | 5.44  | 18.1 | 0.991 | 0.766 | 0.534 | 0.331 | 0.157 | 0.055 |
| 96.961  | 6.15  | 10.0 | 1.004 | 0.793 | 0.588 | 0.179 | 0.048 | 0.024 |
| 97.060  | 4.87  | 7.1  | 0.998 | 0.773 | 0.610 | 0.166 | 0.044 | 0.021 |
| 97.101  | 6.23  | 9.6  | 1.006 | 0.901 | 0.364 | 0.260 | 0.077 | 0.045 |
| 98.105  | 4.43  | 10.5 | 1.005 | 0.919 | 0.333 | 0.232 | 0.060 | 0.039 |
| 98.959  | 5.77  | 10.5 | 1.002 | 0.783 | 0.597 | 0.186 | 0.054 | 0.026 |
| 99.039  | 5.00  | 7.4  | 0.997 | 0.922 | 0.294 | 0.242 | 0.065 | 0.043 |
| 99.081  | 6.93  | 7.6  | 0.992 | 0.908 | 0.324 | 0.232 | 0.061 | 0.040 |
| 99.121  | 5.19  | 13.1 | 1.011 | 0.815 | 0.570 | 0.181 | 0.047 | 0.025 |
| 100.084 | 4.78  | 8.5  | 0.994 | 0.903 | 0.324 | 0.260 | 0.077 | 0.044 |
| 100.954 | 4.54  | 11.3 | 1.003 | 0.788 | 0.596 | 0.172 | 0.046 | 0.022 |
| 101.060 | 6.36  | 5.3  | 1.002 | 0.884 | 0.413 | 0.229 | 0.063 | 0.037 |
| 101.097 | 6.38  | 11.6 | 1.002 | 0.825 | 0.524 | 0.222 | 0.068 | 0.034 |
| 102.062 | 4.35  | 8.1  | 1.007 | 0.897 | 0.395 | 0.230 | 0.062 | 0.038 |
| 102.099 | 4.52  | 11.1 | 1.003 | 0.830 | 0.507 | 0.246 | 0.081 | 0.038 |

|         |      |      |       |       |       |       |       |       |
|---------|------|------|-------|-------|-------|-------|-------|-------|
| 103.075 | 7.76 | 8.0  | 1.004 | 0.902 | 0.406 | 0.167 | 0.033 | 0.023 |
| 104.079 | 5.23 | 10.4 | 1.003 | 0.896 | 0.418 | 0.167 | 0.033 | 0.023 |
| 105.039 | 4.53 | 9.7  | 1.008 | 0.942 | 0.218 | 0.283 | 0.083 | 0.056 |
| 105.071 | 5.96 | 7.7  | 1.014 | 0.817 | 0.574 | 0.176 | 0.045 | 0.025 |
| 105.091 | 6.37 | 11.4 | 1.010 | 0.799 | 0.582 | 0.209 | 0.064 | 0.030 |
| 106.077 | 5.27 | 12.4 | 1.006 | 0.945 | 0.254 | 0.232 | 0.057 | 0.040 |
| 106.097 | 4.27 | 10.7 | 1.012 | 0.806 | 0.575 | 0.209 | 0.063 | 0.030 |
| 107.066 | 7.14 | 18.5 | 0.999 | 0.903 | 0.379 | 0.199 | 0.046 | 0.030 |
| 107.085 | 9.06 | 9.8  | 1.002 | 0.959 | 0.174 | 0.232 | 0.055 | 0.041 |
| 108.069 | 4.79 | 13.2 | 0.996 | 0.889 | 0.404 | 0.196 | 0.046 | 0.029 |
| 108.089 | 6.63 | 12.7 | 1.003 | 0.960 | 0.172 | 0.230 | 0.054 | 0.040 |
| 109.070 | 6.30 | 11.1 | 1.008 | 0.941 | 0.181 | 0.314 | 0.101 | 0.062 |
| 109.099 | 5.08 | 8.0  | 1.000 | 0.900 | 0.382 | 0.210 | 0.051 | 0.034 |
| 110.071 | 4.49 | 11.8 | 1.008 | 0.945 | 0.177 | 0.304 | 0.094 | 0.057 |
| 111.047 | 6.01 | 13.9 | 1.009 | 0.956 | 0.109 | 0.304 | 0.092 | 0.058 |
| 111.080 | 4.55 | 8.7  | 1.002 | 0.960 | 0.209 | 0.199 | 0.041 | 0.032 |
| 111.104 | 5.08 | 18.5 | 0.991 | 0.774 | 0.528 | 0.322 | 0.147 | 0.053 |
| 111.119 | 4.43 | 15.4 | 1.015 | 0.616 | 0.785 | 0.186 | 0.083 | 0.024 |
| 112.049 | 4.31 | 13.1 | 1.009 | 0.946 | 0.147 | 0.317 | 0.101 | 0.063 |
| 113.029 | 4.64 | 10.4 | 1.007 | 0.947 | 0.220 | 0.260 | 0.070 | 0.046 |
| 113.057 | 4.92 | 7.5  | 1.003 | 0.944 | 0.232 | 0.245 | 0.063 | 0.044 |
| 113.098 | 4.83 | 9.9  | 1.011 | 0.886 | 0.430 | 0.230 | 0.063 | 0.037 |
| 115.077 | 5.84 | 8.8  | 1.007 | 0.864 | 0.424 | 0.299 | 0.107 | 0.055 |
| 115.112 | 8.78 | 12.0 | 1.000 | 0.883 | 0.396 | 0.254 | 0.076 | 0.044 |
| 116.078 | 4.47 | 8.6  | 1.006 | 0.845 | 0.490 | 0.240 | 0.075 | 0.039 |
| 116.116 | 6.32 | 14.8 | 1.001 | 0.884 | 0.399 | 0.249 | 0.074 | 0.044 |
| 117.047 | 4.87 | 13.0 | 0.990 | 0.909 | 0.307 | 0.243 | 0.067 | 0.043 |
| 117.091 | 9.14 | 6.7  | 0.986 | 0.780 | 0.526 | 0.295 | 0.125 | 0.050 |
| 118.095 | 6.53 | 8.7  | 0.986 | 0.775 | 0.531 | 0.298 | 0.129 | 0.051 |
| 119.072 | 5.54 | 11.9 | 0.997 | 0.792 | 0.530 | 0.293 | 0.121 | 0.046 |
| 119.089 | 6.44 | 15.5 | 1.000 | 0.815 | 0.477 | 0.330 | 0.141 | 0.054 |
| 119.107 | 6.36 | 8.4  | 1.013 | 0.639 | 0.768 | 0.166 | 0.063 | 0.020 |
| 120.092 | 4.95 | 14.5 | 0.998 | 0.797 | 0.478 | 0.363 | 0.172 | 0.062 |
| 121.068 | 6.43 | 10.5 | 0.997 | 0.883 | 0.372 | 0.275 | 0.089 | 0.049 |
| 121.096 | 5.61 | 7.5  | 1.000 | 0.853 | 0.477 | 0.212 | 0.058 | 0.034 |
| 121.122 | 5.17 | 15.8 | 0.986 | 0.721 | 0.572 | 0.352 | 0.192 | 0.058 |
| 122.072 | 4.76 | 10.1 | 0.998 | 0.888 | 0.369 | 0.265 | 0.082 | 0.046 |
| 122.118 | 4.18 | 7.2  | 0.987 | 0.791 | 0.529 | 0.260 | 0.097 | 0.047 |
| 123.047 | 4.56 | 7.8  | 0.996 | 0.864 | 0.396 | 0.299 | 0.107 | 0.055 |
| 123.076 | 4.56 | 8.4  | 1.001 | 0.880 | 0.384 | 0.280 | 0.092 | 0.049 |
| 123.117 | 4.82 | 13.2 | 1.007 | 0.944 | 0.229 | 0.264 | 0.072 | 0.047 |
| 125.095 | 4.54 | 7.0  | 1.004 | 0.894 | 0.382 | 0.249 | 0.072 | 0.042 |
| 125.132 | 4.39 | 10.2 | 1.012 | 0.900 | 0.388 | 0.252 | 0.073 | 0.044 |
| 127.073 | 4.49 | 8.6  | 1.000 | 0.934 | 0.262 | 0.243 | 0.063 | 0.042 |
| 127.112 | 5.31 | 7.5  | 1.002 | 0.900 | 0.331 | 0.289 | 0.094 | 0.053 |
| 129.064 | 4.37 | 8.4  | 1.000 | 0.937 | 0.231 | 0.263 | 0.073 | 0.048 |

|         |      |      |       |       |       |       |       |       |
|---------|------|------|-------|-------|-------|-------|-------|-------|
| 129.091 | 4.93 | 8.0  | 1.017 | 0.802 | 0.604 | 0.157 | 0.037 | 0.020 |
| 129.127 | 4.95 | 13.9 | 1.006 | 0.913 | 0.340 | 0.250 | 0.070 | 0.044 |
| 131.084 | 4.61 | 9.4  | 1.011 | 0.881 | 0.467 | 0.166 | 0.034 | 0.023 |
| 131.107 | 5.75 | 11.5 | 0.992 | 0.697 | 0.689 | 0.151 | 0.045 | 0.019 |
| 132.109 | 4.29 | 9.2  | 0.998 | 0.707 | 0.687 | 0.150 | 0.043 | 0.019 |
| 133.073 | 4.45 | 8.4  | 1.003 | 0.909 | 0.369 | 0.209 | 0.050 | 0.034 |
| 133.102 | 4.45 | 8.6  | 1.013 | 0.693 | 0.722 | 0.156 | 0.048 | 0.020 |
| 133.123 | 5.60 | 12.3 | 1.008 | 0.826 | 0.515 | 0.264 | 0.093 | 0.041 |
| 135.102 | 6.69 | 9.2  | 0.991 | 0.848 | 0.431 | 0.279 | 0.097 | 0.046 |
| 135.134 | 5.80 | 12.9 | 0.989 | 0.755 | 0.560 | 0.307 | 0.142 | 0.047 |
| 136.022 | 6.66 | 7.5  | 0.991 | 0.896 | 0.334 | 0.258 | 0.076 | 0.046 |
| 136.105 | 4.67 | 8.1  | 0.991 | 0.842 | 0.437 | 0.288 | 0.105 | 0.048 |
| 136.140 | 4.26 | 8.9  | 0.990 | 0.759 | 0.549 | 0.319 | 0.150 | 0.052 |
| 137.024 | 4.70 | 9.3  | 0.991 | 0.907 | 0.321 | 0.240 | 0.066 | 0.042 |
| 137.101 | 4.71 | 10.6 | 0.994 | 0.837 | 0.446 | 0.298 | 0.112 | 0.052 |
| 137.132 | 5.28 | 7.3  | 1.019 | 0.663 | 0.691 | 0.348 | 0.216 | 0.060 |
| 138.018 | 4.36 | 9.9  | 0.989 | 0.902 | 0.296 | 0.277 | 0.086 | 0.053 |
| 139.076 | 4.58 | 7.7  | 0.998 | 0.895 | 0.341 | 0.282 | 0.090 | 0.050 |
| 139.134 | 4.12 | 13.1 | 0.988 | 0.821 | 0.446 | 0.323 | 0.134 | 0.059 |
| 141.129 | 5.52 | 15.5 | 1.008 | 0.939 | 0.236 | 0.281 | 0.082 | 0.052 |
| 142.131 | 4.26 | 13.4 | 1.007 | 0.942 | 0.223 | 0.276 | 0.079 | 0.052 |
| 143.115 | 4.69 | 11.7 | 0.995 | 0.891 | 0.351 | 0.271 | 0.085 | 0.050 |
| 143.143 | 7.11 | 16.7 | 1.009 | 0.924 | 0.292 | 0.280 | 0.084 | 0.052 |
| 144.146 | 5.20 | 18.6 | 1.008 | 0.928 | 0.270 | 0.285 | 0.086 | 0.054 |
| 145.123 | 7.43 | 10.5 | 0.971 | 0.777 | 0.495 | 0.304 | 0.133 | 0.054 |
| 146.126 | 5.30 | 11.6 | 0.972 | 0.774 | 0.498 | 0.310 | 0.138 | 0.055 |
| 147.113 | 4.37 | 6.9  | 1.002 | 0.893 | 0.391 | 0.234 | 0.064 | 0.042 |
| 147.134 | 4.37 | 7.4  | 0.989 | 0.831 | 0.473 | 0.255 | 0.086 | 0.042 |
| 149.045 | 6.08 | 15.9 | 1.007 | 0.964 | 0.099 | 0.274 | 0.075 | 0.055 |
| 149.123 | 5.49 | 6.6  | 0.988 | 0.906 | 0.344 | 0.189 | 0.042 | 0.030 |
| 150.046 | 4.67 | 16.0 | 1.006 | 0.965 | 0.099 | 0.268 | 0.072 | 0.052 |
| 151.034 | 4.64 | 15.9 | 1.006 | 0.950 | 0.087 | 0.319 | 0.101 | 0.063 |
| 155.144 | 4.26 | 9.2  | 1.008 | 0.935 | 0.285 | 0.244 | 0.064 | 0.044 |
| 157.159 | 4.33 | 10.5 | 1.008 | 0.897 | 0.335 | 0.314 | 0.109 | 0.062 |
| 159.065 | 5.00 | 16.8 | 1.002 | 0.943 | 0.266 | 0.208 | 0.046 | 0.032 |
| 159.138 | 4.49 | 8.5  | 1.004 | 0.877 | 0.399 | 0.282 | 0.094 | 0.053 |
| 161.104 | 4.39 | 8.2  | 1.007 | 0.891 | 0.434 | 0.181 | 0.039 | 0.027 |
| 161.154 | 4.82 | 13.6 | 1.009 | 0.917 | 0.331 | 0.260 | 0.074 | 0.046 |
| 163.096 | 6.55 | 19.1 | 1.007 | 0.969 | 0.129 | 0.241 | 0.058 | 0.042 |
| 163.131 | 5.72 | 8.3  | 0.986 | 0.862 | 0.411 | 0.247 | 0.076 | 0.043 |
| 164.100 | 5.30 | 15.9 | 1.003 | 0.950 | 0.184 | 0.262 | 0.070 | 0.049 |
| 165.083 | 5.74 | 14.8 | 1.007 | 0.960 | 0.128 | 0.277 | 0.077 | 0.052 |
| 166.083 | 4.45 | 13.7 | 1.007 | 0.965 | 0.134 | 0.253 | 0.064 | 0.047 |
| 167.056 | 7.45 | 14.2 | 1.007 | 0.972 | 0.100 | 0.246 | 0.060 | 0.045 |
| 168.057 | 5.71 | 16.6 | 1.007 | 0.973 | 0.103 | 0.238 | 0.057 | 0.043 |
| 169.044 | 5.92 | 15.6 | 1.006 | 0.967 | 0.122 | 0.250 | 0.062 | 0.046 |

|         |      |      |       |       |       |       |       |       |
|---------|------|------|-------|-------|-------|-------|-------|-------|
| 170.041 | 4.44 | 15.0 | 1.004 | 0.966 | 0.135 | 0.239 | 0.058 | 0.045 |
| 171.032 | 4.43 | 13.3 | 1.005 | 0.967 | 0.126 | 0.245 | 0.060 | 0.045 |
| 171.173 | 4.87 | 15.7 | 1.004 | 0.905 | 0.202 | 0.384 | 0.152 | 0.077 |
| 173.153 | 5.20 | 9.3  | 0.997 | 0.825 | 0.440 | 0.345 | 0.149 | 0.060 |
| 177.076 | 4.67 | 12.8 | 1.001 | 0.868 | 0.427 | 0.258 | 0.081 | 0.046 |
| 177.150 | 4.71 | 5.9  | 0.993 | 0.888 | 0.374 | 0.240 | 0.068 | 0.042 |
| 189.184 | 4.23 | 11.7 | 1.010 | 0.901 | 0.350 | 0.291 | 0.094 | 0.053 |
| 191.163 | 4.35 | 7.3  | 0.984 | 0.831 | 0.451 | 0.270 | 0.095 | 0.046 |
| 195.087 | 5.59 | 17.1 | 1.000 | 0.805 | 0.496 | 0.326 | 0.141 | 0.056 |
| 196.088 | 4.48 | 14.3 | 0.999 | 0.819 | 0.462 | 0.337 | 0.145 | 0.058 |
| 197.074 | 4.64 | 13.8 | 1.000 | 0.821 | 0.469 | 0.325 | 0.135 | 0.056 |
| 201.184 | 4.34 | 9.4  | 1.013 | 0.901 | 0.341 | 0.312 | 0.107 | 0.053 |
| 205.186 | 4.29 | 7.1  | 0.992 | 0.880 | 0.365 | 0.278 | 0.091 | 0.053 |

---
