# Supplementary material for: From cow to cheese: genetic parameters of the flavour fingerprint of cheese investigated by direct-injection mass spectrometry (PTR-ToF-MS)
Source: Springer Nature journal article supplement (doi:10.1186/s12711-016-0263-4), 2016-11-16
Supplement: MOESM2 [file 12711_2016_263_MOESM2_ESM.pdf]

| PC | Measured mass ( $m/z$ ) | Sum formula             | Theoretical mass ( $m/z$ ) | r     | Tentative identification                                                                                              |
|----|-------------------------|-------------------------|----------------------------|-------|-----------------------------------------------------------------------------------------------------------------------|
| 1  | 117.091                 | $C_6H_{13}O_2^+$        | 117.0910                   | -0.80 | Ethyl butanoate, ethyl-2-methylpropanoate (ethyl isobutyrate), hexanoic acid                                          |
|    | 127.112                 | $C_8H_{15}O^+$          | 127.1120                   | -0.73 | 1-Octen-3-one                                                                                                         |
|    | 145.123                 | $C_8H_{17}O_2^+$        | 145.1229                   | -0.73 | Ethyl hexanoate, octanoic acid                                                                                        |
|    | 99.081                  | $C_6H_{11}O^+$          | 99.0804                    | -0.69 | Hexanoic acid                                                                                                         |
|    | 71.086                  | $C_5H_{11}^+$           | 71.0855                    | -0.61 | 3-Methyl-1-butanol, 3-methyl-3-buten-1-ol, pentan-1-ol                                                                |
| 2  | 69.070                  | $C_5H_9^+$              | 69.0698                    | -0.62 | 2-Methyl-1,3-butadiene (isoprene)                                                                                     |
|    | 115.112                 | $C_7H_{15}O^+$          | 115.1117                   | -0.59 | Heptan-2-one                                                                                                          |
|    | 59.049                  | $C_3H_7O^+$             | 59.0491                    | -0.59 | Propan-2-one (acetone)                                                                                                |
|    | 87.080                  | $C_5H_{11}O^+$          | 87.0804                    | -0.56 | 2-Methylbutanal, 3-methylbutanal, pentan-2-one                                                                        |
|    | 101.097                 | $C_6H_{13}O^+$          | 101.0961                   | -0.55 | Hexan-1-one, hexan-2-one, hexanal                                                                                     |
| 3  | 42.034                  | $C_2H_4N^+$             | 42.0330                    | -0.70 | Acetonitrile                                                                                                          |
|    | 33.034                  | $CH_5O^+$               | 33.0335                    | -0.69 | Methanol                                                                                                              |
|    | 129.127                 | $C_8H_{17}O^+$          | 129.1270                   | 0.66  | Octan-1-one                                                                                                           |
|    | 75.044                  | $C_3H_7O_2^+$           | 75.0440                    | -0.61 | Propanoic acid                                                                                                        |
|    | 143.143                 | $C_9H_{19}O^+$          | 143.1430                   | 0.60  | Nonan-2-one                                                                                                           |
| 4  | 109.070                 | $C_2^{13}CH_{10}O_3N^+$ | 109.0760                   | -0.65 | 2,6-Dimethylpyrazine                                                                                                  |
|    | 95.017                  | $C_2H_7O_2S^+$          | 95.0160                    | -0.52 | Methyldisulfanylmethane (dimethyl disulphide)                                                                         |
|    | 75.044                  | $C_3H_7O_2^+$           | 75.0440                    | 0.40  | Propanoic acid                                                                                                        |
|    | 61.028                  | $C_2H_5O_2^+$           | 61.0284                    | 0.31  | Acetic acid and fragment of acetate ester                                                                             |
|    | 33.034                  | $CH_5O^+$               | 33.0335                    | 0.31  | Methanol                                                                                                              |
| 5  | 60.021                  | $C_2H_4O_2^+$           | 60.0205                    | -0.61 | Acetic acid                                                                                                           |
|    | 103.075                 | $C_5H_{11}O_2^+$        | 103.0754                   | -0.58 | 3-Methylbutanoic acid (isovaleric acid), ethyl (S)-2-hydroxypropanoate (ethyl lactate), pentanoic acid (valeric acid) |
|    | 105.091                 | $C_5H_{13}O_2^+$        | 105.0910                   | 0.55  | 1,2-Pentanediol                                                                                                       |
|    | 87.080                  | $C_5H_{11}O^+$          | 87.0804                    | 0.53  | 2-Methylbutanal, 3-methylbutanal, pentan-2-one                                                                        |
|    | 131.107                 | $C_7H_{15}O_2^+$        | 131.1067                   | -0.49 | Ethyl-2-methylbutanoate, ethyl-3-methylbutanoate (ethyl isovalerate), heptanoic acid                                  |
| 6  | 71.049                  | $C_4H_7O^+$             | 71.0491                    | 0.57  | Butanoic acid                                                                                                         |
|    | 41.039                  | $C_3H_5^+$              | 41.0386                    | -0.56 | Alkyl fragment                                                                                                        |
|    | 57.070                  | $C_4H_9^+$              | 57.0699                    | -0.46 | Alkyl fragment                                                                                                        |
|    | 90.063                  | $C_3^{[13]}CH_9O_2^+$   | 90.0631                    | 0.41  | 2-Methylpropanoic acid (isobutyric acid), butanoic acid, ethyl acetate                                                |
|    | 89.060                  | $C_4H_9O_2^+$           | 89.0597                    | 0.41  | 3-Hydroxy-2-butanone (acetoin)                                                                                        |
| 7  | 144.146                 | $C_8^{[13]}CH_{19}O^+$  | 144.1460                   | 0.43  | Nonan-2-one                                                                                                           |
|    | 143.143                 | $C_9H_{19}O^+$          | 143.1430                   | 0.42  | Nonan-2-one                                                                                                           |
|    | 45.033                  | $C_2H_5O^+$             | 45.0335                    | -0.38 | Ethanal (acetaldehyde)                                                                                                |
|    | 41.039                  | $C_3H_5^+$              | 41.0386                    | -0.38 | Alkyl fragment                                                                                                        |

|    |         |                          |          |       |                                                                                      |
|----|---------|--------------------------|----------|-------|--------------------------------------------------------------------------------------|
|    | 59.049  | $C_3H_7O^+$              | 59.0491  | -0.32 | Propan-2-one (acetone)                                                               |
| 8  | 105.071 | $C_8H_9^+$               | 105.0700 | -0.32 | 2-Phenylethanol/styrene                                                              |
|    | 143.143 | $C_9H_{19}O^+$           | 143.1430 | 0.24  | Nonan-2-one                                                                          |
|    | 55.055  | $C_4H_7^+$               | 55.0542  | 0.20  | Butanal, heptanal, alkyl fragment                                                    |
|    | 61.028  | $C_2H_5O_2^+$            | 61.0284  | 0.19  | Acetic acid and fragment of acetate ester                                            |
|    | 132.109 | $C_6^{[13]}CH_{15}O_2^+$ | 132.1100 | -0.18 | Ethyl-2-methylbutanoate, ethyl-3-methylbutanoate (ethyl isovalerate), heptanoic acid |
| 9  | 55.055  | $C_4H_7^+$               | 55.0542  | 0.32  | Butanal, heptanal, alkyl fragment                                                    |
|    | 71.086  | $C_5H_{11}^+$            | 71.0855  | -0.29 | 3-Methyl-1-butanol, 3-methyl-3-buten-1-ol, pentan-1-ol                               |
|    | 49.011  | $CH_5S^+$                | 49.0106  | -0.25 | Methanethiol                                                                         |
|    | 73.065  | $C_4H_9O^+$              | 73.0648  | 0.25  | Butan-2-one, butanal                                                                 |
|    | 74.069  | $C_3^{[13]}CH_9O^+$      | 73.0648  | 0.22  | Butane-2,3-diol                                                                      |
| 10 | 45.033  | $C_2H_5O^+$              | 45.0335  | 0.39  | Ethanal (acetaldehyde)                                                               |
|    | 49.011  | $CH_5S^+$                | 49.0106  | -0.23 | Methanethiol                                                                         |
|    | 132.109 | $C_6^{[13]}CH_{15}O_2^+$ | 132.1100 | -0.21 | Ethyl-2-methylbutanoate, ethyl-3-methylbutanoate (ethyl isovalerate), heptanoic acid |
|    | 69.070  | $C_5H_9^+$               | 69.0698  | -0.18 | 2-Methyl-1,3-butadiene (isoprene)                                                    |
|    | 99.081  | $C_6H_{11}O^+$           | 99.0804  | 0.16  | Hexanoic acid                                                                        |

---
